# Supplementary material
Source: publisher figshare collection journal article supplement (https://frontiersin.figshare.com/ndownloader/files/13058504)
Supplement: Supplementary file 1 [file 13058504]

Year Published,Principal Investigators,Region Tagged,Longitude,Latitude,Species Group,Species Tagged,IUCN Status,Number of Tags,Tag Type,Tag Brand,Tag Model
2002,Yano & Ito,Japan (Ryukyu Islands),124.7,24.29,Manta rays,Mobula alfredi,Vulnerable,7,Acoustic,Vemco,Vemco with depth sensor
2008,Dewar,Indonesia (Komodo),119.42,-8.82,Manta rays,Mobula alfredi,Vulnerable,41,Acoustic,Vemco,V16
2009,Marshall (PhD Thesis),Mozambique,35.56,-24.02,Manta rays,Mobula alfredi,Vulnerable,14,Acoustic,Vemco,V16
2010,Clark,Hawai'i (Big Island),-156.02,19.6,Manta rays,Mobula alfredi,Vulnerable,3,Acoustic,Vemco,Continuous pinger
2010,Clark,Hawai'i (Big Island),-156.02,19.6,Manta rays,Mobula alfredi,Vulnerable,31,Acoustic,Vemco,V16
2011,Deakos,Hawai'i (Maui),-156.69,20.85,Manta rays,Mobula alfredi,Vulnerable,41,Acoustic,Vemco,V16
2011,Canese,Mediterranean Sea,15.58,38.1,Devil rays,Mobula mobular,Endangered,3,Satellite,Wildlife Computers,Mk10-PAT
2011,van Duinkerken & Marshall (Masters Thesis),Mozambique,35.56,-24.02,Manta rays,Mobula alfredi,Vulnerable,32,Acoustic,Vemco,V16
2012,Croll,Mexico (Baja California Sur),-110.5,24.8,Devil rays,Mobula mobular,Near Threataned,5,Satellite,Wildlife Computers,PAT
2012,Croll,Mexico (Baja California Sur),-110.5,24.8,Devil rays,Mobula mobular,Near Threataned,8,Satellite,Wildlife Computers,Mk10-PAT
2012,Graham,Mexico (Yucatan),-86.72,21.38,Manta rays,Mobula birostris,Vulnerable,6,Satellite,Wildlife Computers,SPOT 5
2012,Papastamatiou,Palmyra Atoll,-162.05,5.53,Manta rays,Mobula alfredi,Vulnerable,11,Acoustic,Vemco,Continuous pinger
2014,McCauley,Palmyra Atoll,-162.05,5.53,Manta rays,Mobula alfredi,Vulnerable,18,Acoustic,Vemco,V16
2014,Braun,Red Sea,40.1,20.05,Manta rays,Mobula alfredi,Vulnerable,5,Satellite,Wildlife Computers,MiniPAT
2014,Braun,Red Sea,40.1,20.05,Manta rays,Mobula alfredi,Vulnerable,4,Satellite,Wildlife Computers,Mk10-AF Fastloc
2014,Jaine & Couturier,East Australia (GBR),152.42,-24.07,Manta rays,Mobula alfredi,Vulnerable,8,Satellite,Wildlife Computers,Mk10-PAT
2014,Jaine & Couturier,East Australia (GBR),152.42,-24.07,Manta rays,Mobula alfredi,Vulnerable,2,Satellite,Microwave Telemetry,X-Tag
2014,Thorrold,Azores,-28.75,38.25,Devil rays,Mobula tarapacana,Vulnerable,4,Satellite,Wildlife Computers,Mk10-AF Fastloc
2014,Thorrold,Azores,-28.75,38.25,Devil rays,Mobula tarapacana,Vulnerable,11,Satellite,Wildlife Computers,MiniPAT
2015,Braun,Red Sea,40.1,20.05,Manta rays,Mobula alfredi,Vulnerable,9,Acoustic,Vemco,V16-6H
2016,Stewart,Mexico (Revillagigedo Archipelago),-110.87,19.05,Manta rays,Mobula birostris,Vulnerable,2,Satellite,Wildlife Computers,Mk10-PAT
2016,Stewart,Mexico (Revillagigedo Archipelago),-110.87,19.05,Manta rays,Mobula birostris,Vulnerable,5,Satellite,Wildlife Computers,MiniPAT
2016,Stewart & Beale,Indonesia (Raja Ampat),130.6,-1.55,Manta rays,Mobula birostris,Vulnerable,9,Satellite,Wildlife Computers,MiniPAT
2016,Stewart & Beale,Indonesia (Raja Ampat),130.6,-1.55,Manta rays,Mobula birostris,Vulnerable,1,Satellite,Wildlife Computers,SPLASH Fastloc
2017,Francis,New Zealand,175.25,-35.66,Devil rays,Mobula mobular,Near Threataned,9,Satellite,Wildlife Computers,MiniPAT
2017,Kessel,Red Sea,37.21,20.93,Manta rays,Mobula alfredi,Vulnerable,3,Satellite,Wildlife Computers,SPOT 5
2017,Kessel,Red Sea,37.21,20.93,Manta rays,Mobula alfredi,Vulnerable,3,Acoustic,Not specified,Not specified
2018,Fontes,Azores,-28.75,38.25,Devil rays,Mobula tarapacana,Vulnerable,2,Satellite,Wildlife Computers,MiniPAT
2018,Fontes,Azores,-28.75,38.25,Devil rays,Mobula tarapacana,Vulnerable,3,Acoustic,Vemco,V16
2018,Couturier & Jaine,East Australia (GBR),152.42,-24.07,Manta rays,Mobula alfredi,Vulnerable,12,Acoustic,Vemco,V16-6H
2018,Couturier & Jaine,East Australia (GBR),152.42,-24.07,Manta rays,Mobula alfredi,Vulnerable,3,Acoustic,Vemco,V16-1H
2018,Couturier & Jaine,East Australia (GBR),152.42,-24.07,Manta rays,Mobula alfredi,Vulnerable,19,Acoustic,Vemco,V16-5H
2018,Erdmann & Murphy (Masters Thesis),Papua New Guinea (Milne Bay),150.68,-10.68,Manta rays,Mobula alfredi,Vulnerable,11,Satellite,Wildlife Computers,SPLASH Fastloc
In review,Setyawan & Erdmann & Sianipar & Lewis & Beale,Indonesia (Raja Ampat),130.52,-0.59,Manta rays,Mobula alfredi,Vulnerable,89,Acoustic,Vemco,V16
Unpublished,Stevens,Maldives (Baa Atoll),73.15,5.17,Manta rays,Mobula alfredi,Vulnerable,15,Acoustic,Vemco,V16 & 1x continuous pinger
Unpublished,Jaine & Couturier (PhD Thesis),East Australia (Stradbroke Island),153.54,-27.41,Manta rays,Mobula alfredi,Vulnerable,2,Satellite,Wildlife Computers,Mk10-PAT
Unpublished,Armstrong (Amelia),West Australia (Coral Bay),113.77,-23.14,Manta rays,Mobula alfredi,Vulnerable,20,Satellite,Wildlife Computers,MiniPAT
Unpublished,Peel,Seychelles,53.3,-5.42,Manta rays,Mobula alfredi,Vulnerable,47,Acoustic,Vemco,V16-5H
Unpublished,Armstrong (Asia),East Australia (GBR),152.42,-24.07,Manta rays,Mobula alfredi,Vulnerable,30,Acoustic,Vemco,V16
Unpublished,Armstrong (Asia),East Australia (Stradbroke Island),153.54,-27.41,Manta rays,Mobula alfredi,Vulnerable,10,Acoustic,Vemco,V16
Unpublished,Graham,Cape Verde,-22.56,16.36,Manta rays,Mobula birostris,Vulnerable,6,Satellite,Wildlife Computers,MiniPAT
Unpublished,Block & Stevens,Chagos (BIOT),71.51,-6.2,Manta rays,Mobula alfredi,Vulnerable,20,Acoustic,Vemco,V16
Unpublished,Block & Stevens,Chagos (BIOT),71.51,-6.2,Manta rays,Mobula alfredi,Vulnerable,15,Satellite,Wildlife Computers,MiniPAT & SPOT
Unpublished,Hartup,Micronesia (Pohnpei),158.15,6.51,Manta rays,Mobula alfredi,Vulnerable,20,Acoustic,Vemco,V16
Unpublished,McGregor,West Australia (Coral Bay),113.77,-23.14,Manta rays,Mobula alfredi,Vulnerable,34,Acoustic,Vemco,V16
Unpublished,Peel,Seychelles,53.3,-5.42,Manta rays,Mobula alfredi,Vulnerable,6,Satellite,Wildlife Computers,MiniPAT
Unpublished,Stewart & Rubin & Ketchum,Mexico (Pacific Coast Mainland),-105.48,20.61,Manta rays,Mobula birostris,Vulnerable,32,Acoustic,Vemco,V16
Unpublished,Burgess & Marshall,Ecuador (Mainland),-81.07,-1.28,Manta rays,Mobula birostris,Vulnerable,29,Acoustic,Vemco,V16
Unpublished,Fontes,Azores (North-East Atlantic),-28.75,38.25,Devil rays,Mobula tarapacana,Vulnerable,13,Acoustic,Vemco,V16
Unpublished,Croll,Mexico (Baja California Sur),-110.5,24.8,Devil rays,Mobula mobular,Near Threataned,1,Satellite,Wildlife Computers,Mk10-PAT
Unpublished,Croll,Mexico (Baja California Sur),-110.5,24.8,Devil rays,Mobula munkiana,Near Threataned,8,Satellite,Wildlife Computers,Mk10-PAT
Unpublished,Croll,Mexico (Baja California Sur),-110.5,24.8,Devil rays,Mobula munkiana,Near Threataned,3,Satellite,Wildlife Computers,MiniPAT
Unpublished,Croll,Mexico (Baja California Sur),-110.6,24.7,Devil rays,Mobula thurstoni,Near Threataned,15,Satellite,Wildlife Computers,Mk10-PAT
Unpublished,Croll,Mexico (Baja California Sur),-110.6,24.7,Devil rays,Mobula thurstoni,Near Threataned,8,Satellite,Wildlife Computers,MiniPAT
Unpublished,Croll,Mexico (Baja California Sur),-110.5,24.8,Devil rays,Mobula munkiana,Near Threataned,2,Acoustic,Vemco,V13
Unpublished,Croll,Mexico (Baja California Sur),-110.5,24.8,Devil rays,Mobula munkiana,Near Threataned,35,Acoustic,Vemco,V13
Unpublished,Croll,Mexico (Baja California Sur),-110.3,24.4,Devil rays,Mobula munkiana,Near Threataned,5,Acoustic,Vemco,V13
Unpublished,Galvan-Magana,Mexico (Baja California Sur),-110.4,24.5,Devil rays,Mobula munkiana,Near Threataned,7,Acoustic,Vemco,V13
Unpublished,Marshall,Brazil,-46.21,-24.41,Manta rays,Mobula birostris,Vulnerable,1,Satellite,Wildlife Computers,MK10-PAT
Unpublished,Marshall,Ecuador (Mainland),-81.07,-1.26,Manta rays,Mobula birostris,Vulnerable,10,Satellite,Wildlife Computers,MK10-PAT
Unpublished,Marshall,Mozambique,35.56,-24.02,Manta rays,Mobula birostris,Vulnerable,6,Satellite,Wildlife Computers,MK10-PAT
Unpublished,Marshall & Jaine,South Africa,31.49,-29.73,Manta rays,Mobula birostris,Vulnerable,2,Satellite,Wildlife Computers,MiniPAT
Unpublished,Beale & Stewart & Erdmann & Setyawan & Sianipar,Indonesia (Raja Ampat),130.6,-1.55,Manta rays,Mobula birostris,Vulnerable,14,Satellite,Wildlife Computers,"MiniPAT, SPLASH Fastloc & SPOT"
Unpublished,Setyawan & Beale & Erdmann,Indonesia (Raja Ampat),130.52,-0.59,Manta rays,Mobula birostris,Vulnerable,37,Acoustic,Vemco,V16
Unpublished,Setyawan & Erdmann & Lewis & Sianipar & Beale,Indonesia (Raja Ampat),130.52,-0.59,Manta rays,Mobula alfredi,Vulnerable,13,Satellite,Wildlife Computers,SPLASH Fastloc
Unpublished,Setyawan & Erdmann & Lewis & Sianipar & Beale,Indonesia (Raja Ampat),130.52,-0.59,Manta rays,Mobula alfredi,Vulnerable,2,Satellite,Wildlife Computers,SPOT
Unpublished,Setyawan & Erdmann & Lewis & Sianipar & Beale,Indonesia (Raja Ampat),130.52,-0.59,Manta rays,Mobula alfredi,Vulnerable,4,Satellite,Wildlife Computers,MiniPAT
Unpublished,Setyawan & Sianipar & Erdmann & Lewis,Indonesia (East Kalimantan),118.49,2.06,Manta rays,Mobula alfredi,Vulnerable,5,Satellite,Wildlife Computers,SPLASH Fastloc
Unpublished,Setyawan & Sianipar & Erdmann & Lewis,Indonesia (Nusa Penida),115.49,-8.78,Manta rays,Mobula alfredi,Vulnerable,8,Satellite,Wildlife Computers,SPLASH Fastloc
Unpublished,Setyawan & Sianipar & Erdmann & Lewis,Indonesia (Komodo),119.59,-8.62,Manta rays,Mobula alfredi,Vulnerable,6,Satellite,Wildlife Computers,SPLASH Fastloc
Unpublished,Lassauce & Erdmann,New Caledonia,166.38,-20.7,Manta rays,Mobula alfredi,Vulnerable,1,Satellite,Wildlife Computers,SPLASH Fastloc
Unpublished,Lassauce & Erdmann,New Caledonia,166.44,-22.5,Manta rays,Mobula alfredi,Vulnerable,7,Satellite,Wildlife Computers,SPLASH Fastloc
Unpublished,Perryman,Indonesia (Raja Ampat),130.54,-0.56,Manta rays,Mobula alfredi,Vulnerable,6,Acoustic,Vemco,V9
Unpublished,Deakos & Jaine & Marshall,Hawai'i (Maui),-156.69,20.85,Manta rays,Mobula alfredi,Vulnerable,4,Satellite,Wildlife Computers,"SPLASH Fastloc, Mk10-PAT"
Unpublished,Kodja,Brazil (Sao Paulo State),-46.22,-24.42,Manta rays,Mobula birostris,Vulnerable,2,Satellite,Wildlife Computers,Mk10-PAT
Unpublished,Kodja,Brazil (Sao Paulo State),-46.22,-24.42,Manta rays,Mobula birostris,Vulnerable,2,Satellite,Wildlife Computers,MiniPAT
Unpublished,Abudaya,Mediterreanean Sea,34.19,31.24,Devil rays,Mobula mobular,Vulnerable,3,Satellite,Wildlife Computers,MiniPAT
